1           **Trans-generational effect of protein restricted diet on adult body and wing size of**  
2                               *Drosophila melanogaster*

3                               Sudhakar Krittika<sup>1</sup>, Pankaj Yadav<sup>1\*</sup>

4  
5           <sup>1</sup> Fly Laboratory # 210, Anusandhan Kendra-II, School of Chemical & Biotechnology,  
6           SASTRA Deemed to be University, Thanjavur-613401, Tamil Nadu, India.

7  
8           **Running title:** Effect of protein restrictions in *Drosophila*.

9  
10          Orcid ID- 0000-0003-0733-5375- Sudhakar Krittika

11          Orcid ID- 0000-0003-2246-305X- Pankaj Yadav

12  
13  
14          E-mails- krittikacbe@gmail.com; pankajyadav@scbt.sastra.edu

15  
16          \***Corresponding author:** E-mail- ypankaj1451981@gmail.com

17          Phone: +91-4362-264101 (3769 Ext.); Fax: +91-4362-264120

18

19

20

21

22

23 **Summary statement:**

24 Twenty generations of protein restricted diet have a diet and generation dependent effect on adult  
25 body size, wing length and body weight.

26

27 **Abstract:**

28 Dietary Restriction (DR) via protein restriction (PR) has become an inquisitive field and has  
29 established feasible trade-offs between various fitness and behavioral traits in *Drosophila*  
30 *melanogaster* to understand lifespan or aging in a nutritionally challenged environment.  
31 However, the phenotypes of body size, weight and wing length respond according to factors such  
32 as flies' genotype, environmental exposure, and parental diet. Hence, understanding the long-  
33 term effect of PR on these phenotypes is essential. Here, we demonstrate the effect of PR diet on  
34 body size, weight and normal & dry wing length of flies subjected to PR50 and PR70 (50% and  
35 70% protein content present in control food respectively) for 20 generations from pre-adult stage.  
36 We found that PR fed flies have lower body weight, relative water content (in males), unaltered  
37 (PR50%) and higher (PR70%) relative fat content in males, smaller normal and dry body size as  
38 compared to control and generations 1 and 2. Interestingly, wing size and pupal size of PR flies  
39 are smaller and showed significant effects of diet and generation. Thus, these traits are sex and  
40 generation dependent along with an interaction of diet, which is capable of modulating these  
41 results variably. Our study suggests that trans-generational effect is more prominent in  
42 influencing these traits and wing length might not be a predictor for body size. Taken together,  
43 the trans-generational effect of PR on fitness and fitness-related traits might be helpful to  
44 understand the underpinning mechanisms of evolution and aging in fruit flies *D. melanogaster*.

45 **Keywords:** *Drosophila*, protein restriction, selection, life-history traits, trans-generational effect.

46

47

48

49

## 50 **Introduction:**

51 Organisms vary in body size not only across species but also within a particular species. The  
52 variations in the body composition can influence phenotypic traits like body size, body weight,  
53 etc., while these trait variations can be attributed to various environmental and genetic factors  
54 (Robertson, 1960, 1963; de Moed et al., 1997). The environmental factors that can influence  
55 organismal body size and weight, including wing length (especially in insects) can be nutrition  
56 (Klepsatel et al., 2018), temperature (Nunney and Cheung, 1997; Karan et al., 1998), crowding  
57 (Miller and Thomas, 1958; Klepsatel et al., 2018), latitudinal clines (Robinson et al., 2000) and  
58 certain cases of laboratory selection pressures for faster development (Yadav and Sharma, 2014),  
59 etc. Body size, weight and wing length are certain parameters that ensure the overall fitness of  
60 organisms including fruit flies. Thus, variations in these phenotypes can be used to understand  
61 the genotypic changes that are bound to occur (Ormerod et al., 2017).

62 Fruit flies *Drosophila melanogaster* for the past three decades, has been widely used as a model  
63 organism for studying aging via nutritional approaches including diet restriction (DR), food  
64 dilution, intermittent feeding, etc., (Bass et al., 2007; Grandison et al., 2009; Katewa et al.,  
65 2012). The diet of fruit flies commonly comprises of carbohydrates and proteins as the major  
66 source, with lipids, vitamins, minerals present in minor quantities. Restricting protein source  
67 (yeast) in the fly food is a type of dietary implementation (Protein Restriction; PR henceforth),  
68 and is seen to influence a range of fitness and fitness-related traits such as lifespan, fecundity,  
69 stress resistance, activity, development time, etc., (Chapman and Partridge, 1996; Katewa et al.,  
70 2012; Sisodia and Singh, 2012; Krittika et al., 2019). Interestingly, PR is known to influence  
71 traits like body size, weight, and wing length, wherein variations in yeast concentration can  
72 significantly alter the body size and weight of the flies, and also have an influence on their wing  
73 length in a single generation itself (environment effect; Robertson, 1960, 1963; Güleret al.,  
74 2015). This might be due to the sudden change in the protein composition; while it is necessary  
75 to assay long term (genetic effect) effect of PR. A high protein diet can yield unaffected pupal  
76 size (Reis, 2016), while the long duration of high protein increased body mass (Kristensen et al.,  
77 2011), also decreased body weight and fat levels (Morris et al., 2012).

78 PR from the pre-adult stage is highly debatable as some studies suggest its negative effect on  
79 lifespan, body size, fecundity (Robertson, 1960; Hodin and Riddiford, 2000; Udugade et al.,

80 2016); while studies claim its positive effect on lifespan and other traits (Katewa et al., 2012;  
81 May et al., 2015; Stefana et al., 2017). The adult body size need not necessarily influence the  
82 lifespan of the organism raised under varied nutritional conditions (Tu and Tatar, 2003). Since,  
83 nutrition during the pre-adult stage largely determines the size of the adult upon eclosion  
84 (Robertson, 1960, 1963; Tu and Tatar, 2003) alongside the influences of juvenile hormones  
85 (Mirth et al., 2014), it is essential to study the long-term effect of PR and not just one or two  
86 generations (Matzkin et al., 2013). Moreover, assaying for one or two generations might address  
87 the immediate effect of parents or grandparents' diet on the off springs and whether it is  
88 maternally inherited or not (Vijendravarma et al., 2010; Valtonen et al., 2012). The current study  
89 assays a trans-generational effect of 20 generations (gen 1, 2, and 20) and does not deal with  
90 understanding the mode of inheritance (maternal or paternal).

91 Here we address the effect of 50% and 70% yeast concentrations (as against the control-AL diet)  
92 across generations 1, 2 and 20. The PR concentrations of 50% and 70% have been used based on  
93 the preliminary PR studies on the lifespan of the flies (unpublished data). This study will address  
94 the effect of PR on a single generation, its offspring (generation 2) and also long-term effect  
95 (generation 20) of the corresponding protein restriction. The assessed traits include body size,  
96 weight, relative water and fat content, pupal size and wing length in the normal and dry  
97 conditions of the fly body. After 20 generations of PR implementation, the PR males and females  
98 have lower body weight as compared to their control in their respective generations and within  
99 the PR generations. Interestingly, the relative water content is higher in females and not males  
100 despite the long-term PR diet. Since, the body weight of the DR flies is lower after generations,  
101 we found it necessary to assess the relative fat content of the flies. We found that the DR70%  
102 males have higher fat storage after 20 generations, while females showed no difference.  
103 Moreover, the flies at generation 20 have lower body size as compared to the generations 1 and 2  
104 and their control, showing that the body size and weight might be positively correlated. Since the  
105 body size is an adult trait, we measured the intermediate pupal size. The PR50 flies at gen 1 and  
106 2 showed the highest pupal size as compared to PR70 and control, while their size was similar at  
107 the end of 20 generations, which might be reflected as a part of smaller adult body size as well.  
108 Lastly, since wing length itself can be an indicator of body size (Sokoloff, 1966), measuring the  
109 same revealed that PR had a diet and generation dependent effect on producing flies with shorter  
110 wings. Thus, after 20 generations, PR diets produce flies with smaller body and wing, lower

111 weight, unaltered pupal size and relative water content (in females). Thus, this study would  
112 benefit to understand the influence of diet and/or the genetic effect (generational study) in  
113 mediating variations in the assayed traits.

#### 114 **Materials and methods:**

##### 115 **Fly culture and maintenance:-**

116 The control and DR imposed flies are maintained on 21-day discrete generation cycles with egg  
117 collection done exactly on the 21<sup>st</sup> day of the previous generation cycle. The control flies are fed  
118 with AL (*Ad Libitum*) food, while the PR stocks are fed with 50% and 70% yeast as compared to  
119 the control (PR50% and PR70%; henceforth). The egg collection for control and PR stocks are  
120 done in their respective AL and PR diets (AL diet but with 50% and 70% yeast for PR50 and  
121 PR70 stocks respectively). The flies upon eclosion are transferred to plexi-glass cages (25 cm ×  
122 20 cm × 15 cm) and are supplemented with their corresponding food. For the following  
123 experiments, approximately 30-40 eggs per vial were collected for control and PR and  
124 maintained at the temperature of ~25 °C (±0.5 °C), the humidity of ~70 %, the light intensity of  
125 ~250 lux in 12:12 hr Light/Dark cycles. The diet manipulations were done only in the yeast  
126 concentration present in the control food, wherein we used instant dry yeast from Gloripan.

##### 127 **Normal body weight and dry weight:-**

128 We measured the normal and dry body weight of freshly eclosed flies collected in every 2 h  
129 intervals. The eggs were collected from the DR stocks over a 2 h window and kept under  
130 LD12:12 h. Post eclosion, the virgin male and female flies were separated by anesthetizing with  
131 CO<sub>2</sub>. For weighing the normal body weight, flies were weighed post anesthetization using ether  
132 (to maintain the flies in the anesthetized state for longer duration), after which the flies were  
133 discarded. For the dry body weight assay, the virgin males and females were killed by freezing  
134 and were dried for 36 h at 70°C as per the protocol followed elsewhere (Yadav and Sharma,  
135 2014). The normal and dry body weight assay was assessed by weighing a group of 10 males or  
136 10 females per vial, and 5 such vials of randomly chosen flies from the control and the DR  
137 stocks were weighed. The body weight of flies was measured using a weighing balance from  
138 UniBloc (Shimadzu) AUX220. The relative water content of the flies was calculated by dividing  
139 the water content (normal body weight-dry weight) by the normal body weight of the flies as

140 reported elsewhere (Robinson et al., 2000). The relative fat content was assessed by dividing the  
141 fat content (dry weight-fat free dry weight) by the dry weight of the flies (Robinson et al., 2000).

142 **Body size/length and wing length:-**

143 The protocol for egg collection until the separation of virgin male and female flies for this assay  
144 is similar to that followed for body weight assay. The flies' body size and wing length were  
145 measured under a microscope, wherein 30 virgin males and females from the control and DR  
146 stocks were assayed. The body size and the wing length of the anesthetized males and females  
147 were measured using a microscope from Olympus with a normal ruler (least count 0.5 mm).

148 **Results:**

149 **Normal and dry body weight:-**

150 To check whether the body size and weight are proportional to each other under the imposed  
151 PR, we assayed body weight and size (normal and dry) of the AL and PR stocks at gen 1, 2  
152 and 20 generations of diet imposition. ANOVA followed by post hoc multiple comparisons  
153 using Tukey's test on the normal body weight of the freshly eclosed male and female fruit  
154 flies showed a statistically significant effect of diet (D;  $F_{2,72}=193.04$ ,  $p<0.0001$ ), generation  
155 (G;  $F_{2,72}=99.63$ ,  $p<0.0001$ ), sex (S;  $F_{1,72}=490.70$ ,  $p<0.0001$ ) and their interaction (D  $\times$  G  $\times$  S;  
156  $F_{4,72}=9.54$ ,  $p<0.0001$ ; Table 1a). The results show that PR50 (males) and PR70 (males and  
157 females) have significantly lower body weight at gen 20 as compared to their previous  
158 generations (Fig. 1A); while PR50 females at gen 20 have lower body weight than gen 2, but  
159 not gen 1. The PR50 and PR70 (males and females) have lower body weight at all tested  
160 generations against their respective control. Thus, with PR and long-term restrictions, the  
161 adult body weight is lower. To assess whether this lower body weight is due to the water  
162 content, we weighed the dry weight of the flies.

163 As expected, the ANOVA on dry body weight of flies revealed statistically significant effect  
164 of D ( $F_{2,72}=106.75$ ,  $p<0.0001$ ), G ( $F_{2,72}=37.78$ ,  $p<0.0001$ ), sex (S;  $F_{1,72}=289.74$ ,  $p<0.0001$ )  
165 and their interaction (D  $\times$  G  $\times$  S;  $F_{4,72}=10.8$ ,  $p<0.0001$ ; Table 1a). Post hoc multiple  
166 comparisons by Tukey's test revealed significantly decreased dry body weight of PR50  
167 (males and females) at gen 20 have lower dry weight as compared to their gen 1, but not gen  
168 2. Interestingly, PR70 males show no effect of generations as their dry weight is not  
169 different, while PR70 females at gen 20 have lower weight as compared to gen 1 and 2 (Fig.

170 1B). The effect of diet shows that at gen 1, the PR50 females are lower in weight, while the  
171 others weigh similar to AL. At gen 2, only PR50 females were lower, but surprisingly at gen  
172 20, PR50 and PR70 (males and females) dry weight difference is prominent and weigh lower  
173 than the control. Thus, the results confirm that the body weight of PR flies is lower than the  
174 AL due to long term diet implementation.

175 Since there exist a difference between the normal and dry body weights across generations,  
176 we assessed the relative water content in the PR flies. ANOVA on the relative water content  
177 revealed statistically significant effect of D ( $F_{2,72}=11.4$ ,  $p<0.0001$ ) and its interaction with  
178 generation ( $D \times G$ ;  $F_{4,72}=10.38$ ,  $p<0.0001$  and  $D \times G \times S$ ;  $F_{4,72}=8.46$ ,  $p<0.0001$ ; Table 1a),  
179 but not G ( $F_{2,72}=3.03$ ,  $p<0.0547$ ), sex (S;  $F_{1,72}=3.87$ ,  $p<0.0531$ ). The relative water content of  
180 the PR50 flies at gen 2 is comparatively higher than gen 1, while PR70 males and females  
181 have higher water content at gen 1 and 20 respectively (Fig. 1C). For the effect of diet across  
182 generations, at gen 1, the PR50 and PR70 flies are equal to AL, while at generation 2, the  
183 PR50 males have similar water content at that of its respective control, while PR70 males  
184 and PR50 females exhibit lower and higher water content respectively. But interestingly at  
185 gen 20, PR males have lower relative water content, while in PR females' it is higher. Thus,  
186 long term PR has facilitated higher water content in PR females and not males.

187 Assessing the direct fat content in flies upon PR can give us information on the fat  
188 metabolism in flies. ANOVA on the relative fat content showed statistically significant  
189 effect of G ( $F_{2,72}=4.87$ ,  $p<0.0104$ ) and its interaction ( $D \times G$ ;  $F_{4,72}=9.76$ ,  $p<0.0001$  and  $D \times$   
190  $G \times S$ ;  $F_{4,72}=14.3$ ,  $p<0.0001$ ; Table 1a), but not D ( $F_{2,72}=0.16$ ,  $p<0.8506$ ) and sex (S;  
191  $F_{1,72}=0.07$ ,  $p<0.7922$ ). The post hoc multiple comparisons by Tukey's test revealed  
192 significantly higher fat content in PR70 males at gen 20, while for females it was not  
193 significant (Fig. 1D). Interestingly, at gen 2, PR70 females stored lesser fat than the AL  
194 females. PR50 flies did not show any difference in their fat content except for PR50 males  
195 which showed higher fat than AL in gen 1 (Fig. 1D). Therefore, with respect to the fat  
196 content, long term PR has facilitated higher fat content in PR70 males alone after 20  
197 generations, while no significant change was observed in females. This reiterates that the fat  
198 accumulation might be sex-dependent and diet dependent as well, given that trans-  
199 generational effect is put into consideration.



200 **Normal and dry body size:-**

201 The flies maintained on PR50% and 70% for 20 generations from the pre-adult stage were  
202 measured for their normal and dry body size. ANOVA on the normal body size of freshly  
203 eclosed adult males and females showed a statistically significant effect of diet (D;  
204  $F_{2,522}=38.51$ ,  $p<0.0001$ ), generation (G;  $F_{2,522}=98.19$ ,  $p<0.0001$ ), sex (S;  $F_{1,522}=611.60$ ,  
205  $p<0.0001$ ) and their interaction (D  $\times$  G;  $F_{4,522}=21.79$ ,  $p<0.0001$  and D  $\times$  S;  $F_{2,522}=17.52$ ,  
206  $p<0.0001$ ) (Table 1b; Fig. 2A), but not D  $\times$  G  $\times$  S ( $F_{4,522}=2.07$ ,  $p<0.0830$ ). Further, post hoc  
207 multiple comparisons using Tukey's HSD test revealed the generation effect is prominent in  
208 the PR flies as their body size at gen 20 is comparatively smaller than the previously tested  
209 generations (1 and 2). The interaction between all three tested factors is not significant  
210 probably due to the fact that body size is capable of higher perturbation to environmental  
211 factors. The effect of diet shows that at gen 1, PR males do not show any difference in body  
212 size, while PR females are smaller. But surprisingly at gen 2, the PR fed males are larger  
213 than AL, while females are similar in size as that of AL, while at gen 20, PR males and  
214 females are smaller than the AL flies. Thus, after 20 generations the PR produces smaller  
215 flies as compared to AL even though minor fluctuations in their body size were observed at  
216 gen 1 and 2.

217 Further, ANOVA followed by multiple comparisons by Tukey's HSD test on the dry body  
218 size showed statistically significant effect of D ( $F_{2,522}=21.23$ ,  $p<0.0001$ ), G ( $F_{2,522}=163.13$ ,  
219  $p<0.0001$ ), S ( $F_{1,522}=363.37$ ,  $p<0.0001$ ) and their interaction (D  $\times$  G;  $F_{4,522}=41.12$ ,  $p<0.0001$ ;  
220 Table 1b; Fig. 2B), but not D  $\times$  S ( $F_{2,522}=1.42$ ,  $p<0.2438$ ) and D  $\times$  G  $\times$  S ( $F_{4,522}=0.86$ ,  
221  $p<0.4907$ ). All the PR flies at gen 2 are bigger as compared to gen 1 and 20, except for PR70  
222 males wherein their dry body size is similar to that observed at gen 1. The effect of diet on  
223 the dry body size revealed that PR flies are similar in size to AL at gen 1, while at gen 2 the  
224 PR70 (males and females) are bigger than AL. Similar to the results of normal body size, the  
225 PR flies are smaller than their control flies at gen 20 and might be due to the factors  
226 discussed earlier with normal body size. Surprisingly, there exist changes in the response of  
227 PR diet on the normal and dry body size, showing that the normal body size and dry body  
228 size might not be equivalent and the difference between them is not constant, and the reason  
229 might be attributed to the various forms of storage reserves.



230 **Pupal size:-**

231 ANOVA followed by Tukey's HSD test on the normal wing length showed a statistically  
232 significant effect of D ( $F_{2,261}=29.34$ ,  $p<0.0001$ ), G ( $F_{2,261}=7.96$ ,  $p<0.0004$ ) and their  
233 interaction (D  $\times$  G;  $F_{4,261}=5.91$ ,  $p<0.0001$ ; Fig. 2C; Table 1c). Post hoc multiple comparisons  
234 by Tukey's test showed that among PR50 flies across generations, gen 1 was the highest,  
235 while at gen 2 and 20 they were similar. Across diets, PR50 flies had a higher pupal size in  
236 gen 1, 2 and gen 20 as compared to AL and PR70 flies. Thus, showing that the PR50 flies  
237 have pupal size higher as compared to the control in all the generations, but within its  
238 generations, the observed highest pupal size at generation 1 might have been a startle  
239 response for PR.

240 **Normal and dry wing length:-**

241 Post body size assessments, we intended to assay the wing length as it is commonly thought  
242 to be a measure of body size as mentioned earlier. ANOVA on the normal wing length  
243 showed statistically significant effect of D ( $F_{2,522}=72.28$ ,  $p<0.0001$ ), G ( $F_{2,522}=28.07$ ,  
244  $p<0.0001$ ), S ( $F_{1,522}=301.92$ ,  $p<0.0001$ ) and their interaction (D  $\times$  G;  $F_{4,522}=10.6$ ,  $p<0.0001$ ;  
245 and D  $\times$  G  $\times$  S;  $F_{4,522}=4.6$ ,  $p<0.0012$ ; Table 1d). Interestingly, multiple comparisons by  
246 Tukey's test within diets across generations shows that gen 20 females have wing length  
247 similar to gen 2, while the males have lower wing length compared to gen 2. Moreover,  
248 PR50 females have smaller wing length as compared to AL in all tested generations; while  
249 PR70 females have smaller wings as compared to AL in the first generation alone (Fig. 3A).  
250 The effect of diet shows that PR flies (males and females) have shorter wings than AL flies  
251 at gen 20. Thus, the concept of wing length as a measure for body size might not hold in the  
252 presence of dietary parameters influencing them across generations.

253 ANOVA on dry wing length of fruit flies revealed significant effect of D ( $F_{2,522}=13.46$ ,  
254  $p<0.0001$ ), G ( $F_{2,522}=33.84$ ,  $p<0.0001$ ), S ( $F_{1,522}=112.05$ ,  $p<0.0001$ ) and their interaction (D  $\times$  G;  
255  $F_{4,522}=26.19$ ,  $p<0.0001$  and D  $\times$  G  $\times$  S;  $F_{4,522}=5.33$ ,  $p<0.0003$ ; Table 1d). Multiple comparisons  
256 of dry wing length by Tukey's test revealed results similar to the normal wing length wherein PR  
257 flies at gen 20 had significantly smaller wings than the control (Fig. 3B). Thus, even though PR  
258 yield flies with shorter wings at the end of 20 generations (similar to dry body size), it is not true

259 across generations, while it explicitly shows significant interaction between diet, sex and  
260 generations.

## 261 **Discussion:-**

### 262 **Normal and dry body weight:-**

263 Our results are similar to the results of another study (Vijendravarma et al., 2010) that show  
264 the effect of diet (parental) on different traits (including body weight) of fruit flies, and it  
265 also suggests that these observed differences might be due to the maternal effects and the  
266 long-term DR imposition. Further, we did not expect variations in the AL body weight  
267 across generations, and convincingly their body weight and relative water content were  
268 unaffected, thereby providing convincing results for the control flies. In the PR50 and 70%  
269 flies, there might be due to the effect of parental diet on the normal body weight of the flies  
270 as suggested elsewhere (Vijendravarma et al., 2010; Valtonen et al., 2012), because the PR  
271 flies showed lower body weight at the end of 20 generations. Moreover, the lower body  
272 weight of PR flies after 20 generations can be thought to be in line with the study of  
273 Kristensen et al., 2011, which reported the protein-rich diet for 17 generations yielded bigger  
274 and thereby fatter flies as compared to the control. But surprisingly, PR70 males have higher  
275 fat content than AL at the end of 20 generations, which makes it contrary to Kristensen et al.,  
276 2011, even though the study reported the implementation of protein-rich diet. The difference  
277 in relative fat content upon sex-based effect is similar to that reported elsewhere, which  
278 showed fat content varied with significant effect of sex (Kristensen et al., 2011) and density  
279 of larvae (Zwaan et al., 1991; Kristensen et al., 2011), while relative fat content varied with  
280 sex alone (Kristensen et al., 2011). But the present study is contrary to the same clinal study  
281 in the fact that our male flies have lower relative water content and higher fat content at the  
282 end of 20 generations. Interestingly, the dry weight of PR males is more stable than the  
283 females and is in line with the study reported elsewhere (Karan et al., 1998). Thus, long term  
284 PR implementation suggests the existence of a plastic response to diet as compared to the  
285 genetic effect in case of dry weight and sex (Kristensen et al., 2011).

### 286 **Body size and Pupal size:-**

287 The body size of PR flies is smaller at generation 20 as compared to their previous  
288 generations and control. These results are contrary to the study of Chippindale et al., 1996,  
289 which reported that bigger adult body size is associated with increased fitness of the flies.  
290 Since the fitness of the organism is assessed based on its reproductive capacity and the  
291 ability to withstand stress, our results might have a positive effect despite a smaller body  
292 size. Moreover, populations of *D. melanogaster* selected for faster development (FD) exhibit  
293 reduced body size, lower lifespan and reduced fitness (Yadav and Sharma, 2013, 2014), but  
294 the PR flies show higher lifespan in spite of their reduced body size (unpublished data).  
295 Surprisingly, flies with large body size exhibit lower larval viability even though they appear  
296 to contribute to the adult fitness (Partridge and Fowler, 1993). Since the females that mated  
297 with smaller males appeared more fecund and also copulated longer (Pitnick, 1991), the  
298 duration of copulation and offspring number are dependent on the female body size and  
299 inversely related to the male body size (Pitnick, 1991; Lefranc and Bundgaard, 2000). In  
300 tandem with these studies, even though the large females differ in size as compared to the  
301 smaller females, does not guarantee significant difference in their ovariole number (Lefranc  
302 and Bundgaard, 2000), even though yeast restriction reduces ovariole number (Tu and Tatar,  
303 2003) and high protein diet is known to increase the same with a possible trade-off in the egg  
304 to adult viability in *D. ananassae* (Sisodia and Singh, 2012). Moreover, since the males of *D.*  
305 *melanogaster* prefer smaller females for first mating and then undergo adaptive  
306 discrimination (Byrne and Rice, 2006) or plasticity for mate selection by males (Edward and  
307 Chapman, 2013), we can conclude that body size may be one of the many traits that are  
308 assessed to choose a potential mate but not a primary one. Hence, the smaller body size of  
309 the PR flies might not be a threat for its mate choice, reproductive success or larval viability  
310 in our study, even though the fecundity of our flies remains to be tested.

311 The pupal size at PR50 flies recorded the highest size as compared to the control and PR70  
312 flies, while gen 1 flies of PR50 yielded highest pupal size compared to gen 20 (Fig. 2C).  
313 Since high protein diet did not confer any change in the pupal size of the flies, but high  
314 carbohydrate diet resulted in smaller pupa (Reis, 2016), it is surprising to see pupal size  
315 difference upon protein restriction. This is in line with the results of Deas et al., 2019; that  
316 suggests more susceptibility of pupal mass change in poor diet than that of rich nutrient diet,  
317 in addition to exhibiting effects of parental and grandparental diet (Deas et al., 2019).

318 Overall, our results also show that diet and generation have a differential role of different  
319 traits as suggested elsewhere (Deas et al., 2019).

### 320 **Normal and dry wing length:-**

321 The concentrations of nutrients (yeast and sugar) in the fly diet play an important role in the  
322 wing length of females than in males (Güler et al., 2015). In our study, since the concentration of  
323 sugar was kept constant, the observed variations in wing length show that the yeast alone can  
324 modulate this trait. The PR flies showed smaller wings after 20 generations depicting  
325 generational effect while there exists variable results due to sex difference. This is contrary to  
326 Güler et al., 2015, where female's wing length varies with yeast manipulations while males vary  
327 with sugar level variations. There are various other factors capable of modulating wing length  
328 like temperature and latitudinal clines (David et al., 1983; de Moed et al., 1997), wherein care  
329 was taken to avoid such temperature perturbations. It is also seen that wing length (similar to that  
330 of body size) can be influenced by altitude in *Drosophila* species (Stalker and Carson, 1948;  
331 Tantawy, 1965). There exists a difference in the PR and generation effect on the trend of body  
332 size and wing length variations and probably, is in contrast to the study of Sokoloff, 1966, which  
333 stated that wing length can serve as a parameter for estimating fly's body size.

### 334 **Conclusion:**

335 The results of our study reports that post 20 generations, the PR flies tend to exhibit lowered  
336 body size, weight, wing length and pupal size which is highly dependent on diet, sex and  
337 generation. It is evident that wing length cannot be an accurate measure of body size and so does  
338 the concept of bigger flies are larger, due to perturbations in body reserves of water and fat.  
339 Therefore, this study along with previous studies of PR can be taken to suggest that diet, sex and  
340 generational effects are capable of interfering with the phenotypic traits of the flies, and thus the  
341 genetic and environment effect is highly prominent.

### 342 **Acknowledgments:-**

343 We thank Dr. Usha Nagarajan, Fly Lab, SASTRA Deemed to be University for the microscope  
344 facility for measuring body size and wing length. We thank N. Ramesh (SASTRA University)  
345 for helping us with population maintenance.

346 **Competing interests:-**

347 The authors declare that they have no conflict of interest.

348 **Funding:-**

349 S. K. acknowledges the Department of Science and Technology- Government of India, for the  
350 INSPIRE fellowship (IF170750). P. Y. acknowledges the Science and Engineering Research  
351 Board (File no- CRG/2019/003184), Department of Science and Technology- Government of  
352 India, India for the financial support and SASTRA Deemed to be University, Thanjavur (TN),  
353 India for the infrastructure.

354 **Author contributions:-**

355 S. K. & P. Y. conceived and designed the experiments; S. K. performed the experiments, and  
356 analyzed the data. S. K. & P. Y. wrote initial versions of the manuscript, corrected, read and  
357 approved the final version of the manuscript.

358

359 **References:-**

360

- 361 1) **Bass, T. M., Grandison, R. C., Wong, R., Martinez, P., Partridge, L. and Piper, M. D.**  
362 (2007). Optimization of dietary restriction protocols in *Drosophila*. *J. Gerontol. A Biol. Sci.*  
363 *Med. Sci.* **62**, 1071-1081.
- 364 2) **Byrne, P. G. and Rice, W. R.** (2006). Evidence for adaptive male mate choice in the  
365 fruit fly *Drosophila melanogaster*. *Proc. Biol. Sci.* **273**, 917-922.
- 366 3) **Chapman, T. and Partridge, L.** (1996). Female fitness in *Drosophila melanogaster*: an  
367 interaction between the effect of nutrition and of encounter rate with males. *Proc. Biol. Sci.*  
368 **263**, 755-759.
- 369 4) **Chippindale, A. K., Chu, T. J. F. and Rose, M. R.** (1996). Complex trade-offs and the  
370 evolution of starvation resistance in *Drosophila melanogaster*. *Evolution.* **50**, 753-766.
- 371 5) **David, J. R., Allemand, R., Van Herrewege, J. and Cohet, Y.** (1983). Ecophysiology:  
372 abiotic factors. In *The Genetics and Biology of Drosophila*. (ed. M. Ashburner, H. L.  
373 Carson and J. N. Thompson Jr), pp. 105-170. Academic Press, London.

- 374 6) **de Moed, G. H., De Jong, G. and Scharloo, W.** (1997). Environmental effects on body  
375 size variation in *Drosophila melanogaster* and its cellular basis. *Genet. Res.* **70**, 35-43.
- 376 7) **Deas, J. B., Blondel, L. and Extavour, C. G.** (2019). Ancestral and offspring nutrition  
377 interact to affect life-history traits in *Drosophila melanogaster*. *Proc. Biol. Sci.* **286**,  
378 2018.2778.
- 379 8) **Edward, D. A. and Chapman, T.** (2013). Variation in male mate choice in *Drosophila*  
380 *melanogaster*. *PLoS One.* **8**, e56299.
- 381 9) **Grandison, R. C., Wong, R., Bass, T. M., Partridge, L. and Piper, M. D.** (2009). Effect  
382 of a standardised dietary restriction protocol on multiple laboratory strains of *Drosophila*  
383 *melanogaster*. *PLoS One.* **4**, e4067.
- 384 10) **Güler, P., Ayhan, N., Kosukcu, C. and Önder, B. S.** (2015). The effects of larval diet  
385 restriction on developmental time, pre adult survival, and wing length in *Drosophila*  
386 *melanogaster*. *Turk. J. Zool.* **39**, 395-403.
- 387 11) **Hodin, J. and Riddiford, L. M.** (2000). Different mechanisms underlie phenotypic  
388 plasticity and interspecific variation for a reproductive character in Drosophilids (Insecta:  
389 Diptera). *Evolution.* **54**, 1638-1653.
- 390 12) **Karan, D., Morina, J. P., Moreteau, B. and David, J. R.** (1998). Body size and  
391 developmental temperature in *Drosophila melanogaster*: analysis of body weight reaction  
392 norm. *J. Therm. Biol.* **23**, 301-309.
- 393 13) **Katewa, S. D., Demontis, F., Kolipinski, M., Hubbard, A., Gill, M. S., Perrimon, N.,**  
394 **Melov, S. and Kapahi, P.** (2012). Intramyocellular fatty-acid metabolism plays a critical  
395 role in mediating responses to dietary restriction in *Drosophila melanogaster*. *Cell. Metab.*  
396 **16**, 97-103.
- 397 14) **Klepsatel, P., Procházka, E. and Gáliková, M.** (2018). Crowding of *Drosophila* larvae  
398 affects lifespan and other life-history traits via reduced availability of dietary yeast. *Exp.*  
399 *Gerontol.* **110**, 298-308.
- 400 15) **Kristensen, T. N., Overgaard, J., Loeschcke, V. and Mayntz, D.** (2011). Dietary protein  
401 content affects evolution for body size, body fat and viability in *Drosophila melanogaster*.  
402 *Biol. Lett.* **7**, 269-272.

- 403 16) **Krittika, S., Lenka, A. and Yadav, P.** (2019). Evidence of dietary protein restriction  
404 regulating pupation height, development time and lifespan in *Drosophila melanogaster*.  
405 *Biol. Open.* **8**, bio042952.
- 406 17) **Lefranc, A. and Bundgaard, J.** (2000). The influence of male and female body size on  
407 copulation duration and fecundity in *Drosophila melanogaster*. *Hereditas.* **132**, 243-247.
- 408 18) **Matzkin, L. M., Johnson S., Paight C. and Markow T. A.** (2013). Preadult parental diet  
409 affects offspring development and metabolism in *Drosophila melanogaster*. *PLoS One.* **8**,  
410 e59530.
- 411 19) **May, C. M., Doroszuk, A. and Zwaan, B. J.** (2015). The effect of developmental nutrition  
412 on life span and fecundity depends on the adult reproductive environment in *Drosophila*  
413 *melanogaster*. *Ecol. Evol.* **5**, 1156-1168.
- 414 20) **Miller, R. S. and Thomas, J. L.** (1958). The Effects of Larval Crowding and Body Size on  
415 the Longevity of Adult *Drosophila Melanogaster*. *Ecology.* **39**, 118.
- 416 21) **Mirth, C. K., Tang, H. Y., Makohon-Moore, S. C., Salhadar, S., Gokhale, R. H.,**  
417 **Warner, R. D., Koyama, T., Riddiford, L. M. and Shingleton, A. W.** (2014). JH controls  
418 body size by altering growth rate. *PNAS USA.* **111**, 7018-7023.
- 419 22) **Morris, S. N., Coogan, C., Chamseddin, K., Fernandez-Kim, S. O., Kolli, S., Keller, J.**  
420 **N. and Bauer, J. H.** (2012). Development of diet-induced insulin resistance in adult  
421 *Drosophila melanogaster*. *Biochim. Biophys. Acta.* **1822**, 1230-1237.
- 422 23) **Nunney, L. and Cheung, W.** (1997). The effect of temperature on body size and fecundity  
423 in female *Drosophila melanogaster*: Evidence for adaptive plasticity. *Evolution.* **51**, 1529-  
424 1535.
- 425 24) **Ormerod, K. G., LePine, O. K., Abbineni, P. S., Bridgeman, J. M., Coorsen, J. R.,**  
426 **Mercier, A. J. and Tattersall, G. J.** (2017). *Drosophila* development, physiology,  
427 behavior, and lifespan are influenced by altered dietary composition. *Fly (Austin).* **11**, 153-  
428 170.
- 429 25) **Partridge, L. and Fowler, K.** (1993). Responses and correlated responses to artificial  
430 selection on thorax length in *Drosophila melanogaster*. *Evolution.* **47**, 213-226.
- 431 26) **Pitnick, S.** (1991). Male size influences mate fecundity and remating interval in  
432 *Drosophila melanogaster*. *Anim. Behav.* **41**, 735-745.



- 433 27) **Reis, T.** (2016). Effects of Synthetic Diets Enriched in Specific Nutrients on *Drosophila*  
434 Development, Body Fat, and Lifespan. *PLoS One*. **11**, e0146758.
- 435 28) **Robertson, F. W.** (1960). The ecological genetics of growth in *Drosophila*. 1. Body size  
436 and development time on different diets. *Genet. Res. Camb.* **1**, 288-304.
- 437 29) **Robertson, F. W.** (1963). The ecological genetics of growth in *Drosophila* 6. The genetic  
438 correlation between the duration of the larval period and body size in relation to larval diet.  
439 *Genet. Res. Camb.* **1**, 74-92.
- 440 30) **Robinson, S. J. W., Zwaan, B. and Partridge, L.** (2000). Starvation resistance and adult  
441 body composition in a latitudinal cline of *Drosophila melanogaster*. *Evolution*. **54**, 1819-  
442 1824.
- 443 31) **Sisodia, S. and Singh, B. N.** (2012). Experimental evidence for nutrition regulated stress  
444 resistance in *Drosophila ananassae*. *PLoS One*. **7**, e46131.
- 445 32) **Sokoloff, A.** (1966). Morphological variation in natural and experimental populations of  
446 *Drosophila pseudoobscura* and *Drosophila persimilis*. *Evolution*. **20**, 49-71.
- 447 33) **Stalker, H. D. and Carson, H. L.** (1948). An altitudinal transect of *Drosophila robusta*  
448 Sturtevant. *Evolution*. **2**, 295-305.
- 449 34) **Stefana, M., Driscoll, P. C., Obata, F., Pengelly, A. R., Newell, C. L, MacRae, J. I. and**  
450 **Gould, A. P.** (2017). Developmental diet regulates *Drosophila* lifespan via lipid autotoxins.  
451 *Nat. Commun.* **8**, 1384.
- 452 35) **Tantawy, A. O.** (1965). Studies on natural populations of *Drosophila*. III. Morphological  
453 and genetic differences of wing length in *Drosophila melanogaster* and *D. simulans* in  
454 relation to season. *Evolution*. **18**, 560-570.
- 455 36) **Tu, M. P. and Tatar, M.** (2003). Juvenile diet restriction and the aging and reproduction of  
456 adult *Drosophila melanogaster*. *Aging Cell*. **2**, 327-333.
- 457 37) **Udugade, R. M., Deshmukh, A. A. and Gajare, K. A.** (2016). Dietary Restriction  
458 Initiated from Larval Stage Decreases Maximum Life Span in *Drosophila melanogaster*.  
459 *IORS-JPBS*. **6**, 37-42.
- 460 38) **Valtonen, T. M., Kangassalo, K., Pölkki, M. and Rantala, M. J.** (2012).  
461 Transgenerational effects of parental larval diet on offspring development time, adult body  
462 size and pathogen resistance in *Drosophila melanogaster*. *PLoS One*. **7**, e31611.

- 463 39) **Vijendravarma, R. K., Narasimha, S. and Kawecki, T. J.** (2010). Effects of parental  
464 larval diet on egg size and offspring traits in *Drosophila*. *Biol. Lett.* **6**, 238-241.
- 465 40) **Yadav, P. and Sharma, V. K.** (2014). Correlated changes in life history traits in response  
466 to selection for faster pre-adult development in the fruit fly *Drosophila melanogaster*. *J.*  
467 *Exp. Biol.* **217**, 580-589.
- 468 41) **Zwaan, B. J., Bijlsma, R. and Hoekstra, R. F.** (1991). On the developmental theory of  
469 ageing. 1. Starvation resistance and longevity in *Drosophila melanogaster* in relation to pre-  
470 adult breeding conditions. *Heredity.* **66**, 29-39.

471 **Figure 1: Low weighed males and females under the PR diet for 20 generations.** The  
472 normal (A) and dry (B) body weight of the flies (varying across generations), shows PR flies  
473 weighing lower than that of AL flies at the end of generation 20. The effect of diet on the  
474 relative water content (C) is prominent, wherein after 20 generations of PR diets, male and  
475 female flies possessed lower and higher water content as compared to AL respectively. The  
476 graph represents diet in the *x*-axis and body weight (A, B), relative water content (C),  
477 relative fat content (D) in the *y*-axis. The bars and error bars are represented as the mean  $\pm$   
478 standard deviation (SD). The asterisks on the bars indicate significance levels wherein the *p*-  
479 value is  $<0.05$ . G1, G2, and G20 represent generation 1, 2, and 20 respectively, while M and  
480 F represents males and females respectively.

481 **Figure 2: Smaller flies and unaltered pupal size due to the PR diet for 20 generations.**  
482 The effect of diet and generation on the normal (A) and dry (B) body size of the flies are  
483 variable, wherein the normal body size of PR flies is lower than their control at the end of  
484 the 20 generations. The pupal size (C) of PR50 flies were the highest at gen 1 as compared to  
485 PR70 and control, but after 20 generations were similar to AL. The graph represents diet in  
486 the *x*-axis and body size (A, B), pupal size (C) in the *y*-axis. All other details are the same as  
487 in Figure 1.

488 **Figure 3: Flies wing length reduced due to long-term PR diet imposition.** The normal  
 489 (A) and dry wing length (B) of the PR flies are smaller than the AL flies post 20 generations,  
 490 but the pattern of variations across generation is different from that witnessed for body size.  
 491 The graph represents diet in the *x*-axis and wing length on the *y*-axis. All other details are the  
 492 same as in Figure 1.

493 **Table 1a:** ANOVA details of the normal & dry body weight and relative water & fat content of  
 494 long-term PR imposed flies.

495

| Assay              | Effect                       | d.f. | MS effect | d.f. error | MS error | <i>F</i> | <i>P</i> < |
|--------------------|------------------------------|------|-----------|------------|----------|----------|------------|
| Normal body weight | Diet (D)                     | 2    | 114.29    | 72         | 0.59     | 193.04   | 0.0001     |
|                    | Gen (G)                      | 2    | 58.99     | 72         | 0.59     | 99.63    | 0.0001     |
|                    | Sex (S)                      | 1    | 290.52    | 72         | 0.59     | 490.7    | 0.0001     |
|                    | Diet × Gen (D × G)           | 4    | 8.65      | 72         | 0.59     | 14.61    | 0.0001     |
|                    | Diet × Sex (D × S)           | 2    | 0.88      | 72         | 0.59     | 1.48     | 0.2342     |
|                    | Gen × Sex (G × S)            | 2    | 0.34      | 72         | 0.59     | 0.57     | 0.5654     |
|                    | Diet × Gen × Sex (D × G × S) | 4    | 5.65      | 72         | 0.59     | 9.54     | 0.0001     |
| Dry body weight    | Diet (D)                     | 2    | 8.7003    | 72         | 0.0815   | 106.75   | 0.0001     |
|                    | Gen (G)                      | 2    | 3.079     | 72         | 0.0815   | 37.78    | 0.0001     |
|                    | Sex (S)                      | 1    | 23.61     | 72         | 0.0815   | 289.74   | 0.0001     |
|                    | Diet × Gen (D × G)           | 4    | 1.015     | 72         | 0.0815   | 12.46    | 0.0001     |
|                    | Diet × Sex (D × S)           | 2    | 2.607     | 72         | 0.0815   | 31.99    | 0.0001     |
|                    | Gen × Sex (G × S)            | 2    | 0.13      | 72         | 0.0815   | 1.61     | 0.2064     |
|                    | Diet × Gen × Sex (D × G × S) | 4    | 0.88      | 72         | 0.0815   | 10.8     | 0.0001     |
| Relative water     | Diet (D)                     | 2    | 0.0077    | 72         | 0.0007   | 11.4     | 0.0001     |
|                    | Gen (G)                      | 2    | 0.002     | 72         | 0.0007   | 3.03     | 0.0547     |

|                         |                                 |   |        |    |        |       |        |
|-------------------------|---------------------------------|---|--------|----|--------|-------|--------|
| content                 | Sex (S)                         | 1 | 0.0026 | 72 | 0.0007 | 3.87  | 0.0531 |
|                         | Diet × Gen (D × G)              | 4 | 0.0070 | 72 | 0.0007 | 10.38 | 0.0001 |
|                         | Diet × Sex (D × S)              | 2 | 0.0225 | 72 | 0.0007 | 33.3  | 0.0001 |
|                         | Gen × Sex (G × S)               | 2 | 0.0035 | 72 | 0.0007 | 5.12  | 0.0083 |
|                         | Diet × Gen × Sex<br>(D × G × S) | 4 | 0.0057 | 72 | 0.0007 | 8.46  | 0.0001 |
| Relative<br>fat content | Diet (D)                        | 2 | 0.0026 | 72 | 0.0163 | 0.16  | 0.8506 |
|                         | Gen (G)                         | 2 | 0.0792 | 72 | 0.0163 | 4.87  | 0.0104 |
|                         | Sex (S)                         | 1 | 0.0011 | 72 | 0.0163 | 0.07  | 0.7922 |
|                         | Diet × Gen (D × G)              | 4 | 0.1587 | 72 | 0.0163 | 9.76  | 0.0001 |
|                         | Diet × Sex (D × S)              | 2 | 0.0508 | 72 | 0.0163 | 3.12  | 0.0501 |
|                         | Gen × Sex (G × S)               | 2 | 0.0329 | 72 | 0.0163 | 2.02  | 0.1399 |
|                         | Diet × Gen × Sex<br>(D × G × S) | 4 | 0.2327 | 72 | 0.0163 | 14.3  | 0.0001 |

496

497 **Table 1b:** ANOVA details of the normal and dry body size of long-term PR imposed flies.

498

| Assay               | Effect                          | d.f. | MS<br>effect | d.f.<br>error | MS error | <i>F</i> | <i>P</i> < |
|---------------------|---------------------------------|------|--------------|---------------|----------|----------|------------|
| Normal<br>body size | Diet (D)                        | 2    | 1.036        | 522           | 0.027    | 38.51    | 0.0001     |
|                     | Gen (G)                         | 2    | 2.641        | 522           | 0.027    | 98.19    | 0.0001     |
|                     | Sex (S)                         | 1    | 16.45        | 522           | 0.027    | 611.60   | 0.0001     |
|                     | Diet × Gen (D × G)              | 4    | 0.586        | 522           | 0.027    | 21.79    | 0.0001     |
|                     | Diet × Sex (D × S)              | 2    | 0.471        | 522           | 0.027    | 17.52    | 0.0001     |
|                     | Gen × Sex (G × S)               | 2    | 0.143        | 522           | 0.027    | 5.32     | 0.0052     |
|                     | Diet × Gen × Sex<br>(D × G × S) | 4    | 0.056        | 522           | 0.027    | 2.07     | 0.083      |
| Dry body<br>size    | Diet (D)                        | 2    | 0.374        | 522           | 0.018    | 21.23    | 0.0001     |
|                     | Gen (G)                         | 2    | 2.870        | 522           | 0.018    | 163.13   | 0.0001     |
|                     | Sex (S)                         | 1    | 6.394        | 522           | 0.018    | 363.37   | 0.0001     |
|                     | Diet × Gen (D × G)              | 4    | 0.724        | 522           | 0.018    | 41.12    | 0.0001     |

|  |                                 |   |        |     |       |      |        |
|--|---------------------------------|---|--------|-----|-------|------|--------|
|  | Diet × Sex (D × S)              | 2 | 0.025  | 522 | 0.018 | 1.42 | 0.2438 |
|  | Gen × Sex (G × S)               | 2 | 0.0004 | 522 | 0.018 | 0.03 | 0.9729 |
|  | Diet × Gen × Sex<br>(D × G × S) | 4 | 0.015  | 522 | 0.018 | 0.86 | 0.4907 |

499

500 **Table 1c:** ANOVA details of the pupal size of long-term PR imposed flies.

501

| Assay      | Effect             | d.f. | MS effect | d.f. error | MS error | F     | P<     |
|------------|--------------------|------|-----------|------------|----------|-------|--------|
| Pupal size | Diet (D)           | 2    | 1.452     | 261        | 0.049    | 29.34 | 0.0001 |
|            | Gen (G)            | 2    | 0.394     | 261        | 0.049    | 7.96  | 0.0004 |
|            | Diet × Gen (D × G) | 4    | 0.292     | 261        | 0.049    | 5.91  | 0.0001 |

502

503 **Table 1d:** ANOVA details of the normal and dry wing length of long-term PR imposed flies.

504

| Assay              | Effect                          | d.f. | MS effect | d.f. error | MS error | F      | P<     |
|--------------------|---------------------------------|------|-----------|------------|----------|--------|--------|
| Normal wing length | Diet (D)                        | 2    | 1.757     | 522        | 0.024    | 72.28  | 0.0001 |
|                    | Gen (G)                         | 2    | 0.682     | 522        | 0.024    | 28.07  | 0.0001 |
|                    | Sex (S)                         | 1    | 7.338     | 522        | 0.024    | 301.92 | 0.0001 |
|                    | Diet × Gen (D × G)              | 4    | 0.258     | 522        | 0.024    | 10.6   | 0.0001 |
|                    | Diet × Sex (D × S)              | 2    | 0.223     | 522        | 0.024    | 9.19   | 0.0001 |
|                    | Gen × Sex (G × S)               | 2    | 0.453     | 522        | 0.024    | 18.62  | 0.0001 |
|                    | Diet × Gen × Sex<br>(D × G × S) | 4    | 0.112     | 522        | 0.024    | 4.6    | 0.0012 |
| Dry wing length    | Diet (D)                        | 2    | 0.287     | 522        | 0.021    | 13.46  | 0.0001 |
|                    | Gen (G)                         | 2    | 0.723     | 522        | 0.021    | 33.84  | 0.0001 |
|                    | Sex (S)                         | 1    | 2.393     | 522        | 0.021    | 112.05 | 0.0001 |
|                    | Diet × Gen (D × G)              | 4    | 0.559     | 522        | 0.021    | 26.19  | 0.0001 |
|                    | Diet × Sex (D × S)              | 2    | 0.608     | 522        | 0.021    | 28.49  | 0.0001 |
|                    | Gen × Sex (G × S)               | 2    | 0.224     | 522        | 0.021    | 10.51  | 0.0001 |

|  |                                 |   |       |     |       |      |        |
|--|---------------------------------|---|-------|-----|-------|------|--------|
|  | Diet × Gen × Sex<br>(D × G × S) | 4 | 0.114 | 522 | 0.021 | 5.33 | 0.0003 |
|--|---------------------------------|---|-------|-----|-------|------|--------|

505

506

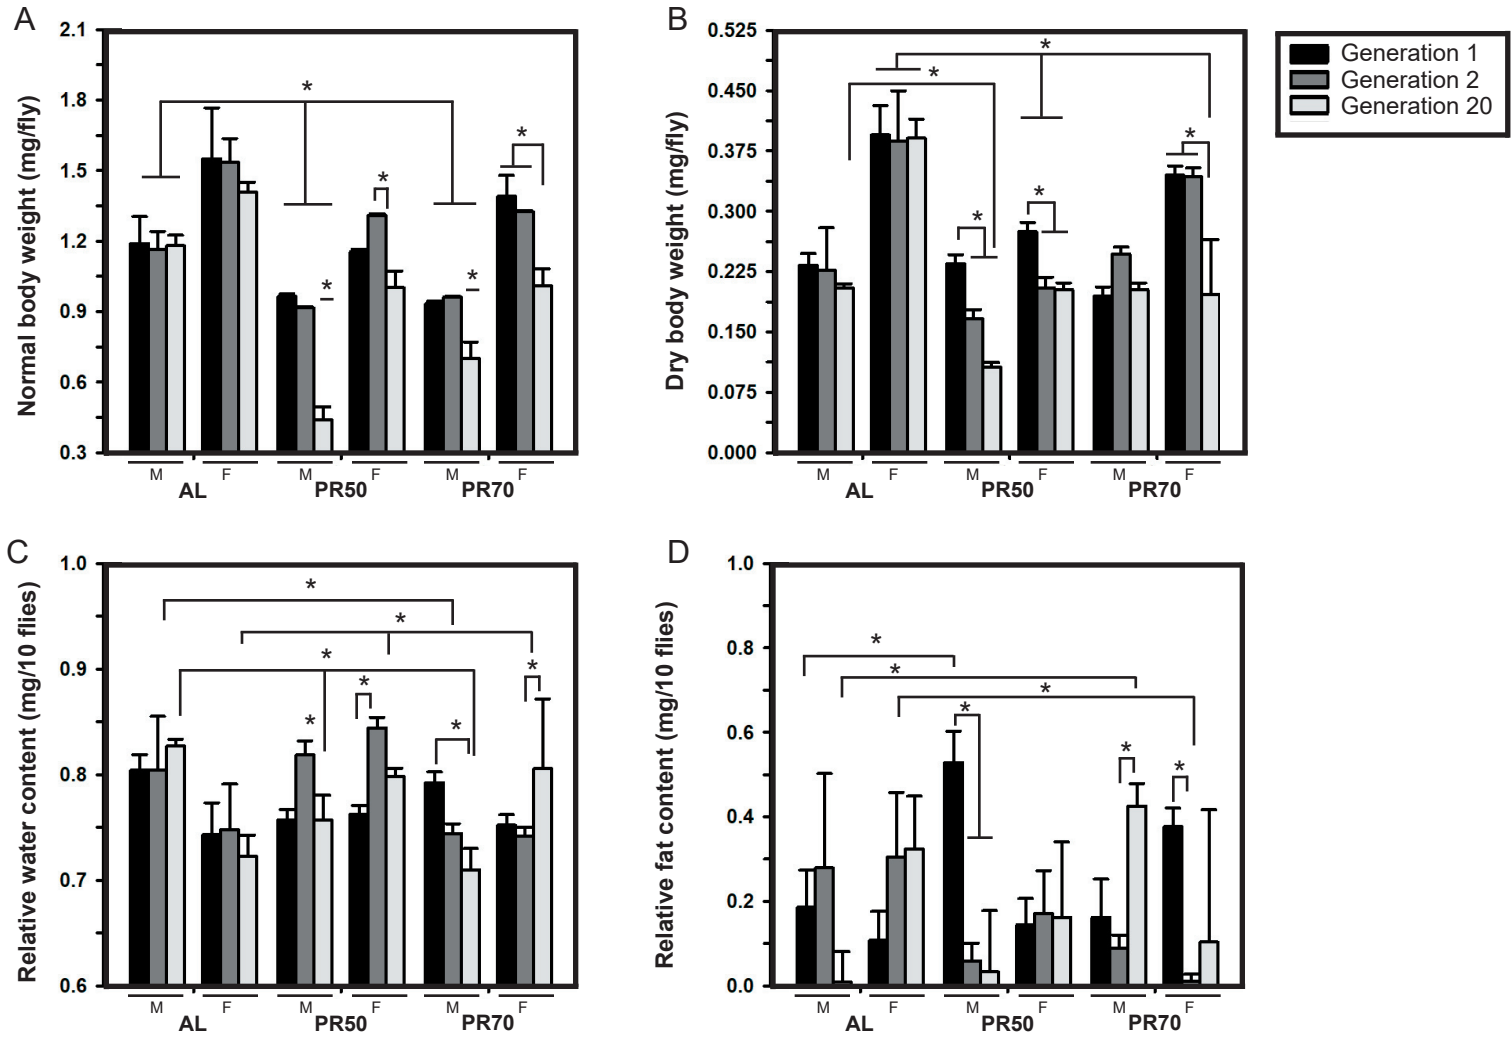



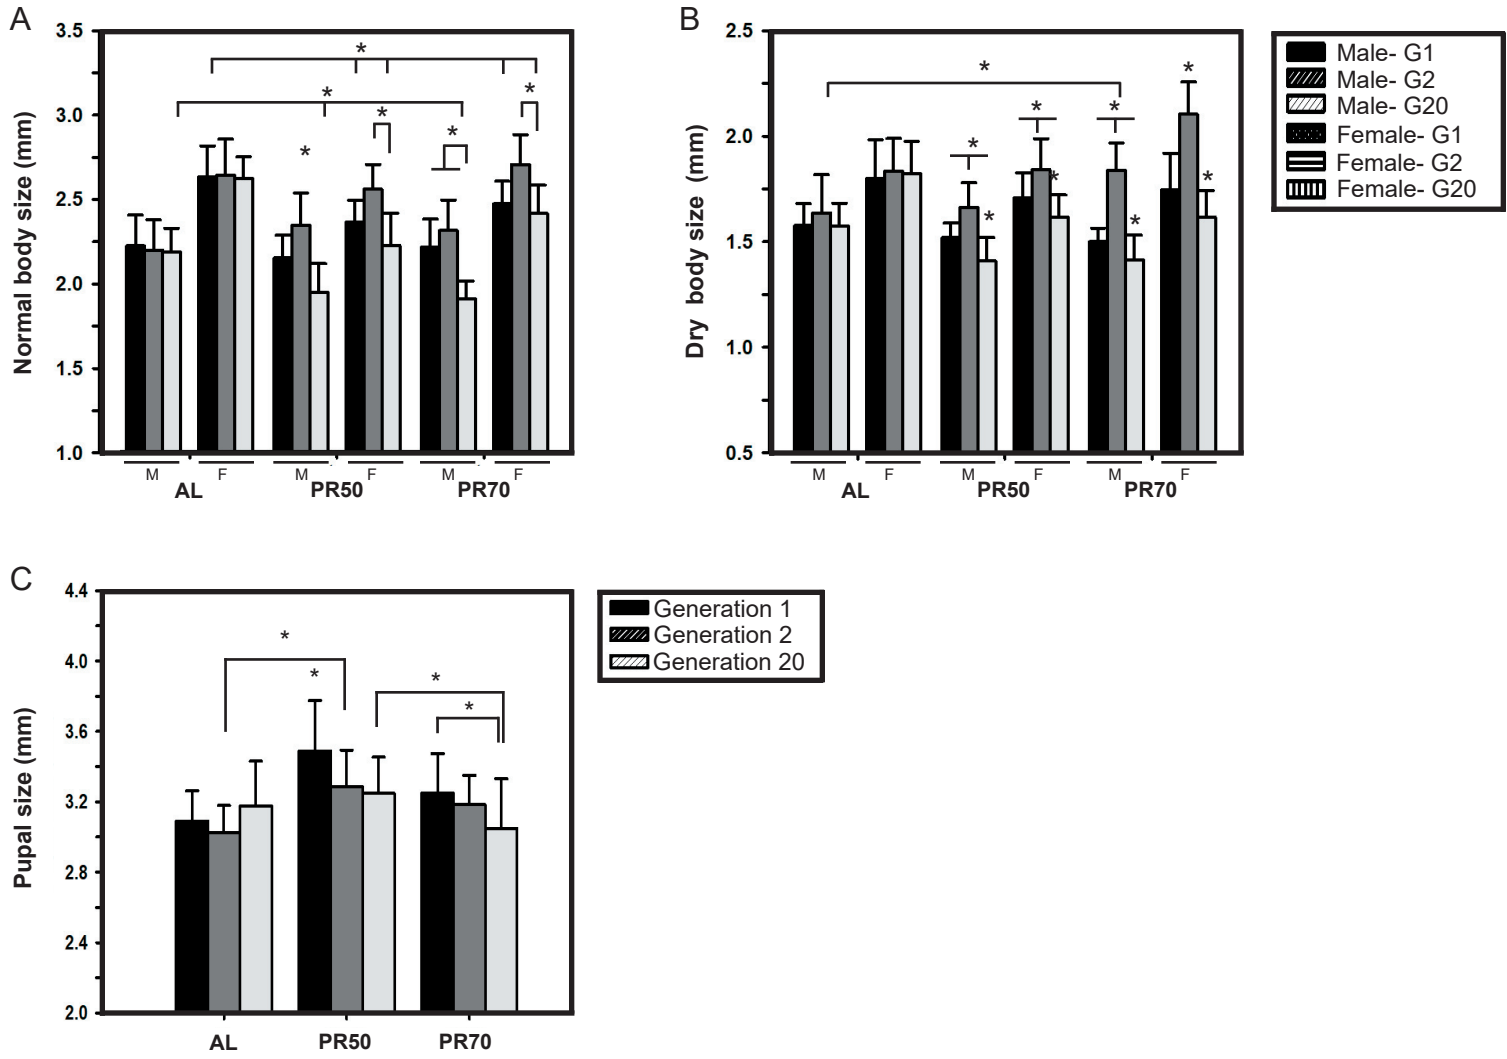

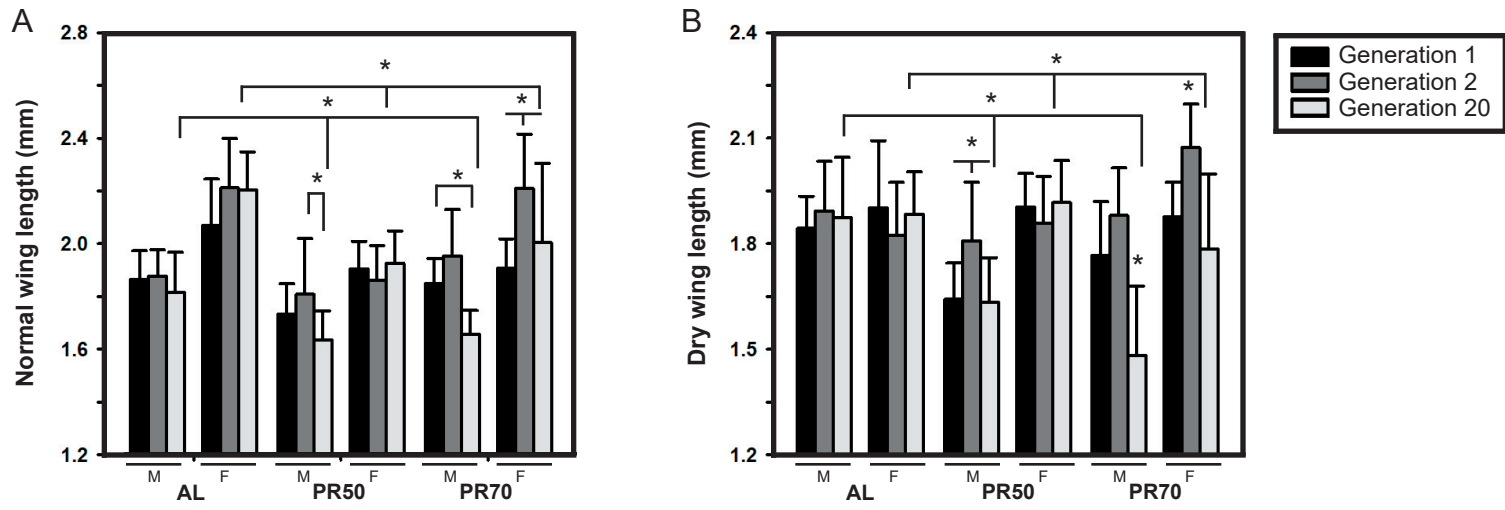

Source: https://www.biorxiv.org/content/10.1101/2020.02.17.952101v4.full.pdf
